# Supplementary material
Source: PubMed Central journal article supplement (PMC5915916)

**Figure S3.** Repeated measures of 24 hour urine creatinine during longitudinal prospective follow-up of CRIC participants.

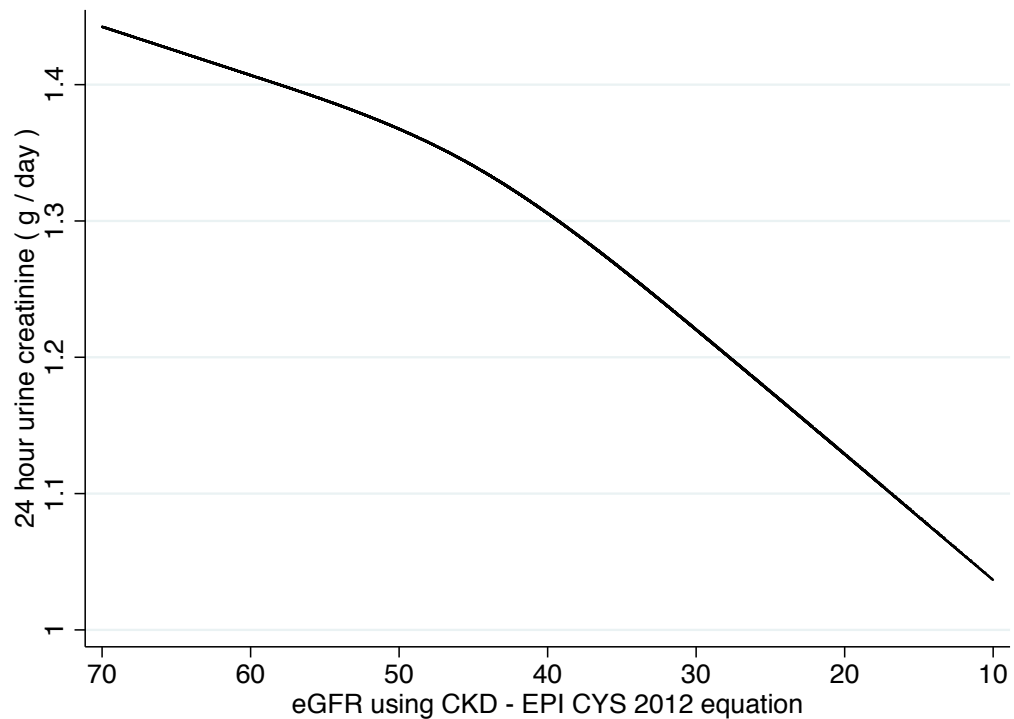

Supplement: NIHMS917743-supplement-3.pdf [file NIHMS917743-supplement-3.pdf]
