# Supplementary material
Source: PubMed Central journal article supplement (PMC5915916)

Figure S4. Repeated measures of serum albumin during longitudinal prospective follow-up of CRIC participants.

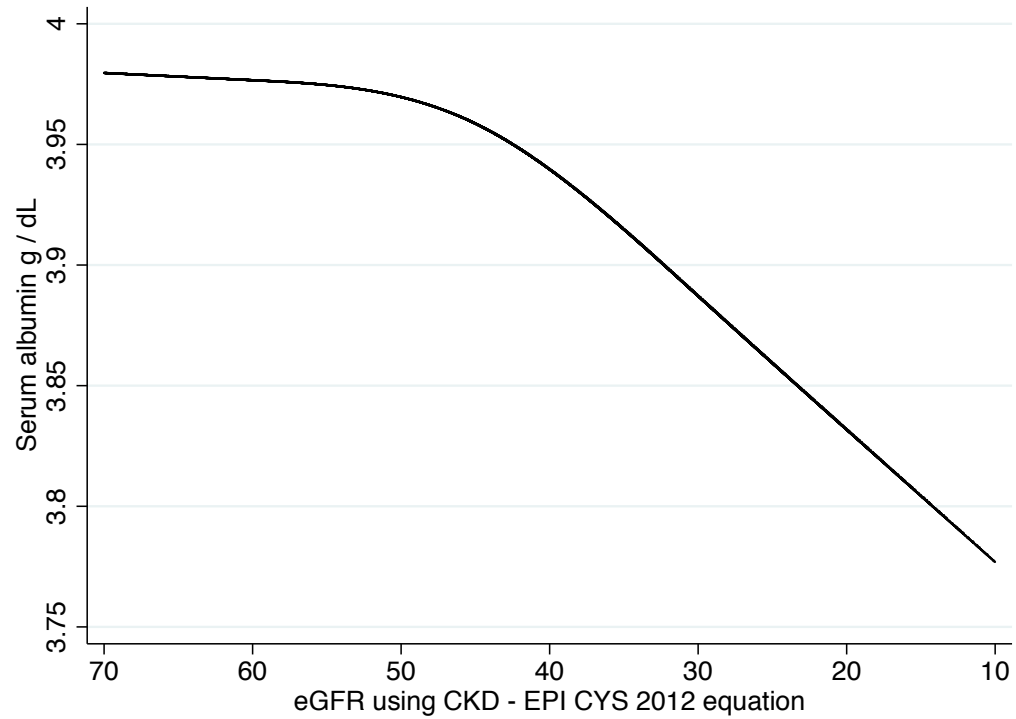

Supplement: NIHMS917743-supplement-4.pdf [file NIHMS917743-supplement-4.pdf]
