# Supplementary material
Source: PubMed Central journal article supplement (PMC5915916)

Figure S5. Repeated measures of LDL during longitudinal prospective follow-up of CRIC participants.

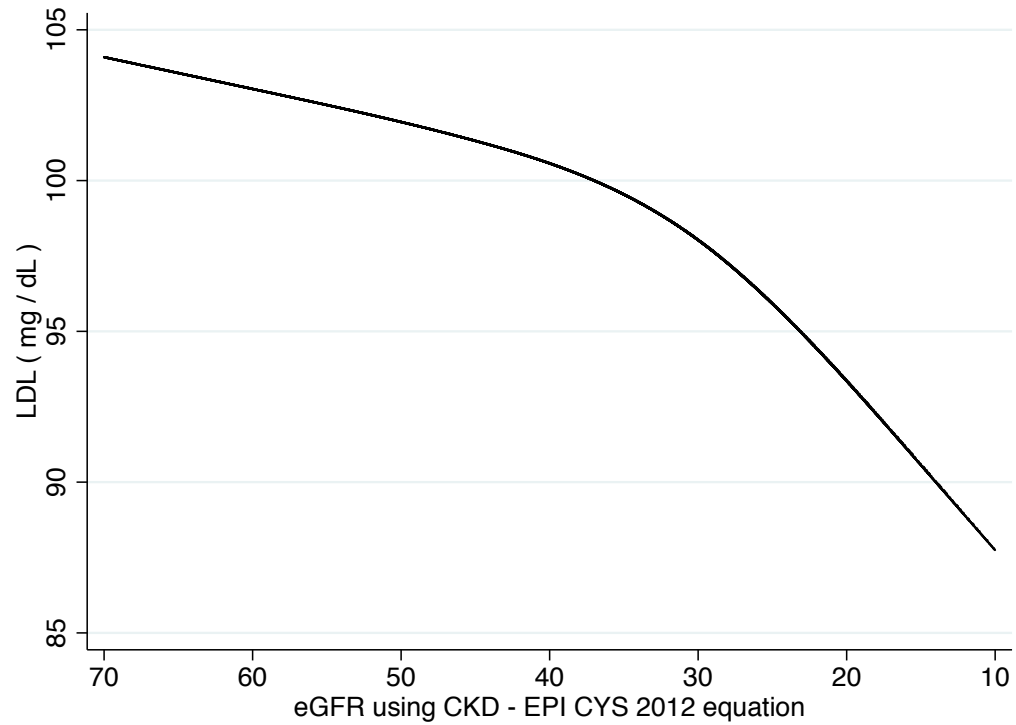

Supplement: NIHMS917743-supplement-5.pdf [file NIHMS917743-supplement-5.pdf]
