# Supplementary material
Source: PubMed Central journal article supplement (PMC5915916)

Figure S6. Repeated measures of fat free mass during longitudinal prospective follow-up of CRIC participants.

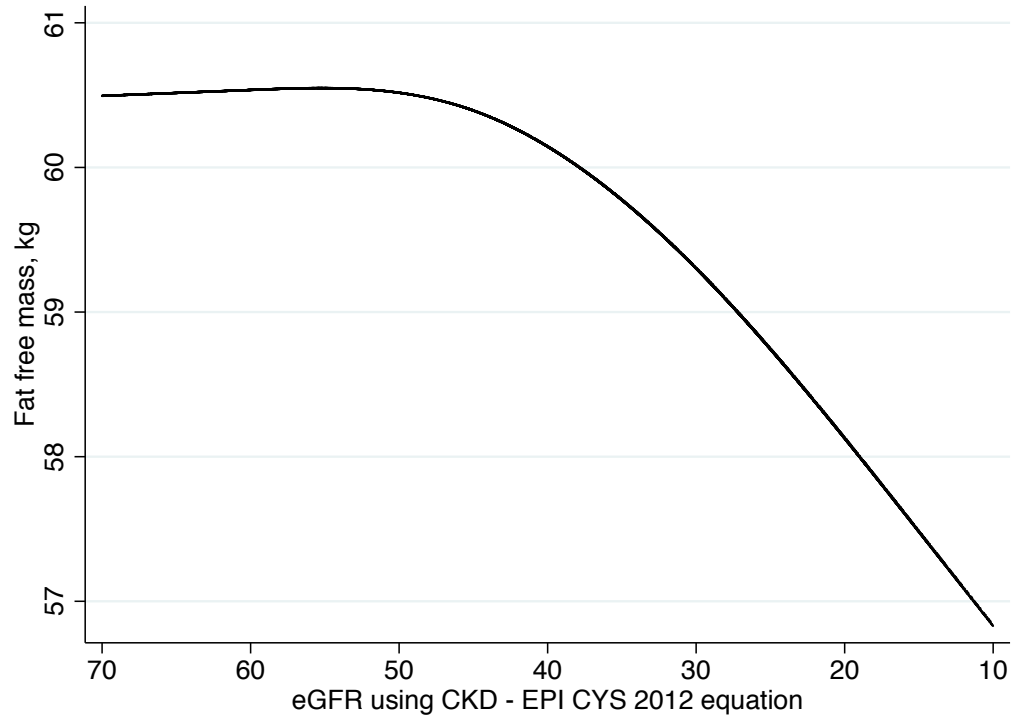

Supplement: NIHMS917743-supplement-6.pdf [file NIHMS917743-supplement-6.pdf]
