# Supplementary material
Source: PubMed Central journal article supplement (PMC5915916)
Supplement: NIHMS917743-supplement-7.pdf [file NIHMS917743-supplement-7.pdf]

**Table S1.** Characteristics at first visit with serum creatinine, cystatin C, and weight available in CRIC and AASK.

| <b>Characteristics during CKD</b>           | <b>CRIC<br/>(N=3933)</b> | <b>Characteristics during<br/>CKD</b>                                 | <b>AASK<br/>(N=1067)</b> |
|---------------------------------------------|--------------------------|-----------------------------------------------------------------------|--------------------------|
| Mean age (yrs) ±SD                          | 57.7 ± 11.0              | Mean age (yrs) ±SD                                                    | 54.1 ± 10.6              |
| Men N (%)                                   | 2156 (54.8)              | Men N (%)                                                             | 653 (61.2)               |
| Black N (%)                                 | 1654 (42.1)              | Black N (%)                                                           | 1067 (100%)              |
| Annual household income <sup>1</sup> N (%)  |                          | Annual household income N (%)                                         |                          |
| ≤\$20,000                                   | 1238 (31.5)              | <\$15,000                                                             | 503 (47.1)               |
| \$20,001-\$50,000                           | 955 (24.3)               | \$15,000-39,999                                                       | 362 (33.9)               |
| ≥\$50,001                                   | 1125 (28.6)              | >\$40,000                                                             | 202 (18.9)               |
| Declined to answer                          | 615 (15.6)               |                                                                       |                          |
| Smoked > 100 cigarettes over lifetime N (%) | 2155 (54.8)              | Current or past smoker determined at time of baseline AASK enrollment | 756 (70.8)               |
| Body mass index (kg/m <sup>2</sup> )        | 32.1± 7.8                | Body mass index (kg/m <sup>2</sup> )                                  | 30.6 ± 6.6               |
| Diabetes N (%)                              | 1903 (48.4)              | Diabetes N (%)                                                        | 0 (0)                    |
| Hypertension N (%)                          | 3386 (86.1)              | Hypertension N (%)                                                    | 1067 (100%)              |
| Prevalent CVD N (%)                         | 1312 (33.4)              | Prevalent heart disease N (%)                                         | 546 (51.2)               |
| Mean serum albumin <sup>4</sup> (g/dL) ± SD | 3.9 ± 0.5                | Mean serum albumin (g/dL) ±SD                                         | 4.2 ± 0.3                |
| Mean serum creatinine (mg/dL) ±SD           | 1.8 ± 0.6                | Mean serum creatinine (mg/dL) ±SD                                     | 2.0 ± 0.7                |
| Systolic BP (mm Hg)                         | 128.5 ± 22.2             | Systolic BP (mm Hg)                                                   | 150.3 ± 23.8             |
| Diastolic BP (mm Hg)                        | 71.6 ± 12.8              | Diastolic BP (mm Hg)                                                  | 95.5 ± 14.2              |

<sup>1</sup> Albumin missing in N=53; BMI missing in N=4; Serum creatinine missing in N=7

<sup>2</sup> Defined as MI, stroke, CHF, or PVD by self-report.

<sup>3</sup> Determined at baseline based on a combination of self-report, chart review, or baseline electrocardiogram reading.
