# Supplementary material
Source: PubMed Central journal article supplement (PMC5915916)
Supplement: NIHMS917743-supplement-8.pdf [file NIHMS917743-supplement-8.pdf]

**Table S2.** Baseline characteristics of those included and excluded from mortality analysis in CRIC and AASK.

Baseline characteristics at first CRIC visit of those included and excluded from mortality analysis in CRIC.

| Characteristics during CKD                  | Included (N=770) | Excluded (N=101) | P-value |
|---------------------------------------------|------------------|------------------|---------|
| Mean age (yrs) ±SD                          | 56.5 ± 11.0      | 51.3 ± 14.1      | <0.001  |
| Men N (%)                                   | 455 (59.1)       | 67 (66.3)        | 0.16    |
| Black N (%)                                 | 418 (54.3)       | 50 (49.5)        | 0.37    |
| Annual household income N (%)               |                  |                  | 0.60    |
| ≤\$20,000                                   | 337 (43.8)       | 52 (51.5)        |         |
| \$20,001-\$50,000                           | 179 (23.2)       | 21 (20.8)        |         |
| ≥\$50,001                                   | 135 (17.5)       | 17 (16.7)        |         |
| Decline to answer                           | 119 (15.5)       | 11 (10.9)        |         |
| Smoked > 100 cigarettes over lifetime N (%) | 448 (58.2)       | 59 (58.4)        | 0.96    |
| Diabetes N (%)                              | 518 (67.3)       | 67 (66.3)        | 0.85    |
| Hypertension N (%)                          | 735 (95.5)       | 92 (91.1)        | 0.06    |
| Prevalent CVD N (%)                         | 322 (41.8)       | 35 (34.7)        | 0.17    |
| Mean serum albumin (g/dL) ± SD              | 3.7 ± 0.5        | 3.6 ± 0.6        | 0.69    |
| COPD N (%)                                  | 20 (2.6%)        | 8 (8.0)          | 0.005   |
| Cancer N (%)                                | 82 (10.8)        | 6 (5.9)          | 0.13    |
| Systolic BP (mm Hg)                         | 139.4 ± 24.1     | 135.4 ± 23.5     | 0.09    |
| Diastolic BP (mm Hg)                        | 72.9 ± 13.9      | 76.4 ± 14.5      | 0.14    |
| Median hemoglobin A1C (%)                   | 6.7 [5.8-8.1]    | 6.4[5.7-8.3]     | 0.36    |

Baseline characteristics of those included and excluded from mortality analysis in AASK.

| Characteristics during CKD                                            | Included (N=333) | Excluded (N=64) | P-value |
|-----------------------------------------------------------------------|------------------|-----------------|---------|
| Mean age (yrs) ±SD                                                    | 51.7 ± 11.3      | 49.1 ± 11.7     | 0.10    |
| Men N (%)                                                             | 199 (59.8)       | 38 (59.4)       | 0.95    |
| Annual household income determined at baseline AASK enrollment N (%)  |                  |                 | <0.001  |
| <\$15,000                                                             | 165 (49.6)       | 25 (39.1)       |         |
| \$15,000-39,999                                                       | 117 (35.1)       | 19 (29.7)       |         |
| >\$40,000                                                             | 51 (15.3)        | 20 (31.3)       |         |
| Current or past smoker determined at time of baseline AASK enrollment | 179 (53.8)       | 38 (59.4)       | 0.41    |
| Prevalent CVD N (%)                                                   | 168 (50.5)       | 32 (50.0)       | 0.95    |
| Mean serum albumin (g/dL) ±SD                                         | 4.1 ± 0.4        | 4.2 ± 0.4       | 0.18    |
| Systolic BP (mm Hg)                                                   | 147.1 ± 24.0     | 150.4 ± 24.1    | 0.33    |
| Diastolic BP (mm Hg)                                                  | 91.5 ± 16.3      | 97.5 ± 14.1     | <0.001  |
