# Supplementary material
Source: PubMed Central journal article supplement (PMC5915916)
Supplement: NIHMS917743-supplement-9.pdf [file NIHMS917743-supplement-9.pdf]

**Table S3.** Distribution of participants by BMI when eGFR first fell below 35 mL/min/1.73 m<sup>2</sup>, BMI at time of dialysis initiation, and weight change category in CRIC and AASK participants.

| <b>CRIC (N=770)</b>                                                                                      |                             |                                 |                              |                         |                                      |                              |                                 |                              |                         |
|----------------------------------------------------------------------------------------------------------|-----------------------------|---------------------------------|------------------------------|-------------------------|--------------------------------------|------------------------------|---------------------------------|------------------------------|-------------------------|
| <b>BMI starting at CKD</b><br>(when eGFR <sub>cre</sub> first falls below 35 mL/min/1.73m <sup>2</sup> ) | <b>Underweight</b><br>(N=5) | <b>Normal weight</b><br>(N=115) | <b>Overweight</b><br>(N=194) | <b>Obese</b><br>(N=456) | <b>BMI at ESRD</b>                   | <b>Underweight</b><br>(N=15) | <b>Normal weight</b><br>(N=176) | <b>Overweight</b><br>(N=215) | <b>Obese</b><br>(N=364) |
| <b>Subsequent weight change during CKD</b>                                                               |                             |                                 |                              |                         | <b>Weight changes preceding ESRD</b> |                              |                                 |                              |                         |
| Significant weight gain                                                                                  | 1                           | 14                              | 11                           | 19                      | Significant weight gain              | 0                            | 6                               | 11                           | 28                      |
| Weight change within ± 5%                                                                                | 4                           | 80                              | 151                          | 335                     | Weight change within ± 5%            | 9                            | 113                             | 160                          | 288                     |
| Significant weight loss                                                                                  | 0                           | 21                              | 32                           | 102                     | Significant weight loss              | 6                            | 57                              | 44                           | 48                      |

  

| <b>AASK (N=333)</b>                                                                                      |                             |                                |                             |                         |                                      |                              |                                |                             |                         |
|----------------------------------------------------------------------------------------------------------|-----------------------------|--------------------------------|-----------------------------|-------------------------|--------------------------------------|------------------------------|--------------------------------|-----------------------------|-------------------------|
| <b>BMI starting at CKD</b><br>(when eGFR <sub>cre</sub> first falls below 35 mL/min/1.73m <sup>2</sup> ) | <b>Underweight</b><br>(N=4) | <b>Normal weight</b><br>(N=56) | <b>Overweight</b><br>(N=81) | <b>Obese</b><br>(N=192) | <b>BMI at ESRD</b>                   | <b>Underweight</b><br>(N=24) | <b>Normal weight</b><br>(N=89) | <b>Overweight</b><br>(N=83) | <b>Obese</b><br>(N=137) |
| <b>Subsequent weight change during CKD</b>                                                               |                             |                                |                             |                         | <b>Weight changes preceding ESRD</b> |                              |                                |                             |                         |
| Significant weight gain                                                                                  | 1                           | 3                              | 1                           | 5                       | Significant weight gain              | 0                            | 2                              | 2                           | 6                       |
| Weight change within ± 5%                                                                                | 3                           | 47                             | 70                          | 160                     | Weight change within ± 5%            | 17                           | 73                             | 71                          | 119                     |
| Significant weight loss                                                                                  | 0                           | 6                              | 10                          | 27                      | Significant weight loss              | 7                            | 14                             | 10                          | 12                      |
