# Supplementary material
Source: PubMed Central journal article supplement (PMC5915916)

**Figure S1.** Derivation of AASK cohort for weight trajectory and death analysis.

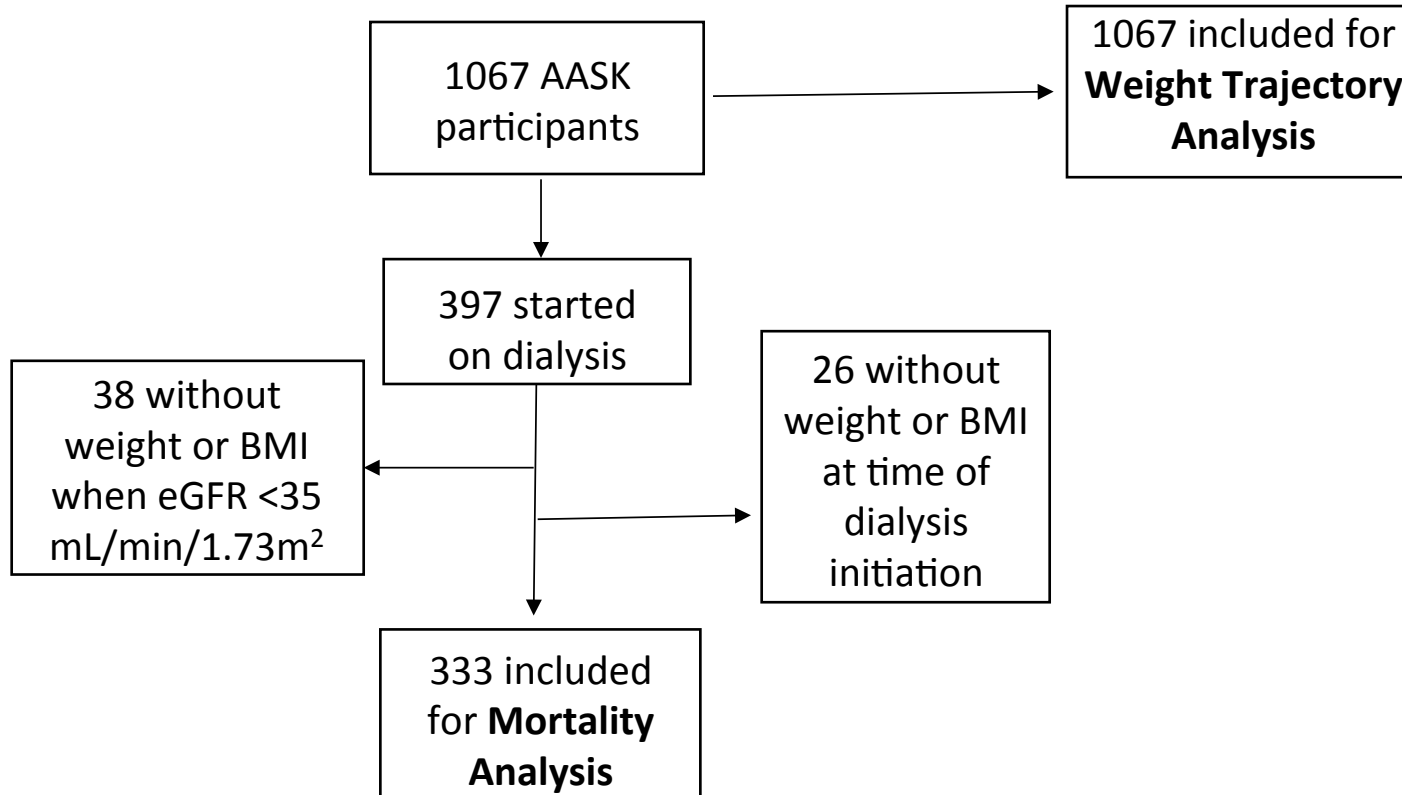

Supplement: NIHMS917743-supplement-1.pdf [file NIHMS917743-supplement-1.pdf]

Figure S2. Stratified analysis of weight trajectory by sex in CRIC participants

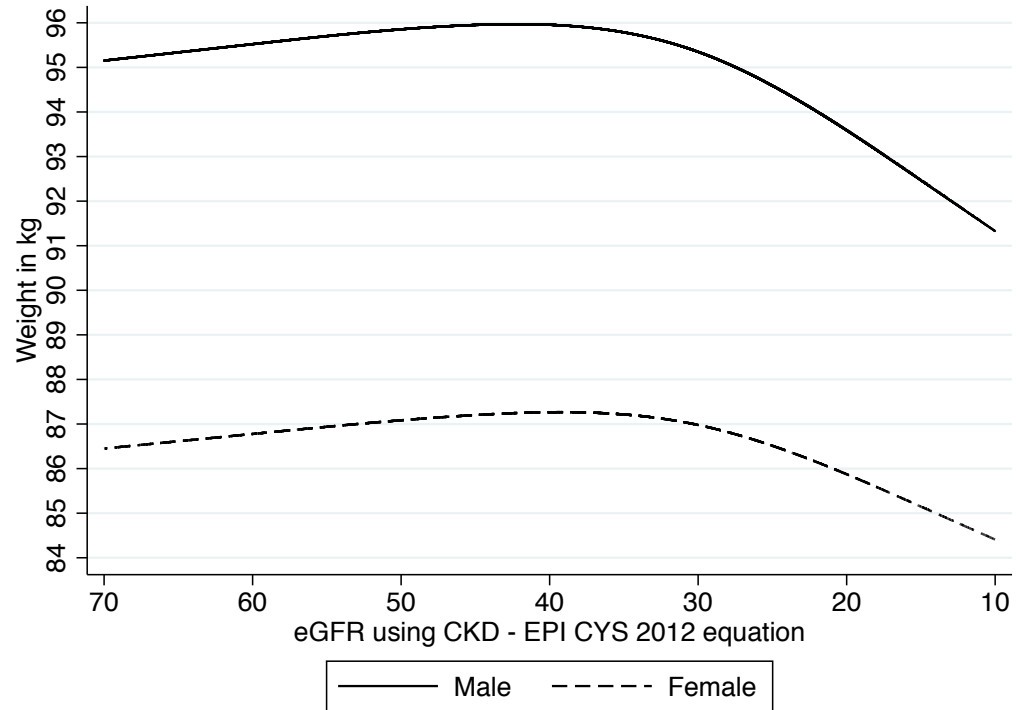

Supplement: NIHMS917743-supplement-2.pdf [file NIHMS917743-supplement-2.pdf]
